# Supplementary material for: Intestinal Carnitine Status and Fatty Acid Oxidation in Response to Clofibrate and Medium-Chain Triglyceride Supplementation in Newborn Pigs
Source: MDPI journal article supplement (doi:10.3390/ijms24076066), 2023-03-23
Supplement: s1 [file s1]

**Supplemental Table S1.** Milk replacer composition and diet formulation

| Ingredient                       | g/ 100 g of dry powder |
|----------------------------------|------------------------|
| Whey                             | 55.57                  |
| Sodium caseinate                 | 14.06                  |
| Whey protein concentrate         | 12.67                  |
| Delactosed whey                  | 6.43                   |
| Edible lard                      | 5.50                   |
| Dicalcium phosphate              | 2.76                   |
| Other#                           | 3.01                   |
| Total                            | 100.00                 |
| Calculated nutrition composition |                        |
| Energy, Kcal/g                   | 4.23                   |
| Crude protein, %                 | 31.25                  |
| Crude fat, %*                    | 7.50                   |
| Lactose, %                       | 43.18                  |
| Calcium, %                       | 1.48                   |
| Phosphorus, %                    | 1.32                   |
| Lysine, %                        | 3.06                   |
| Methionine, %                    | 1.29                   |
| Tryptophan, %                    | 0.47                   |
| Isoleucine, %                    | 1.80                   |
| Histidine, %                     | 0.71                   |
| Phenylalanine, %                 | 1.25                   |
| Threonine, %                     | 1.62                   |
| Leucine, %                       | 3.07                   |
| Valine, %                        | 1.93                   |

#Other, g/kg diet: mineral premix, 6.3; D/L-methionine, 6.2; potassium sorbate, 5.6; L-lysine HCl, 4.5; calcium chloride, 4.1; vitamin premix, 1.4; flavor additive, 0.6; emulsifier, 0.6; flow agent, 0.5; tetrasodium pyrophosphate, 0.3; antioxidant 0.01; Milk Specialties, Eden Prairie, MN 55344. \*Whey products contributed another 2% of fat to the dry powder.

**Supplemental Table S2.** Experimental Dietary formulation (1 kg milk)

|                   | Diets  |        |        |        |
|-------------------|--------|--------|--------|--------|
|                   | SUC    | TMPA   | TC5    | TC6    |
| <b>Components</b> | Kg     |        |        |        |
| Basal dry powder  | 0.1280 | 0.1280 | 0.1280 | 0.1280 |
| Soybean Oil       | 0.0259 | 0.0237 | 0.0237 | 0.0237 |
| TC6               |        |        |        | 0.0064 |
| TC5               |        |        | 0.0068 |        |
| T2M               |        | 0.0064 |        |        |
| Succinate         | 0.0048 |        |        |        |
| Glycerol          | 0.0016 |        |        |        |
| Water             | 0.8397 | 0.8419 | 0.8415 | 0.8419 |
| Total             | 1      | 1      | 1      | 1      |

SUC, glycerol-succinate; TMPA, triglyceride of 2-methylpentanoic acid; TC5, triglyceride of valeric acid; TC6, triglyceride of hexanoic acid;

**Supplemental Table S3.** Primers used in this study with expected amplicon size post RT-qPCR. Gene Bank numbers provided to demonstrate the genes of the pig genome referenced.

|                                | Forward primer (5'-3'), Sen | Reverse primer (5'-3'), Anti | Amplicon Size, bp | NCBI (Gene Bank) |
|--------------------------------|-----------------------------|------------------------------|-------------------|------------------|
| <i>ACOX</i>                    | GGTCCATCCACGCTGTCTTA        | CACGTGGGTGACTTGAGACT         | 119               | NM_001101028.1   |
| <i>BBOX</i>                    | AACTGGCGGTTACTTCACGG        | CCACATCCCAGTCGGCATAA         | 91                | XM_003122909.5   |
| <i>FABP2</i>                   | CAACGAGTGGATAATGGAAAAGAGT   | CCTCTTGGCTTCTACTCCTTCA       | 99                | NM_001031780.1   |
| <i>CPT1A</i>                   | GCTGACGATGGTTATGGGGT        | TCCCGAAGCGATGAGAATCC         | 109               | NM_001129805.1   |
| <i>CPT1B</i>                   | GCCTGACCTATGAAGCCTCG        | TGAACGAAGGCTGTGGACTC         | 94                | NM_001007191.1   |
| <i>PPAR<math>\alpha</math></i> | GCTGGACGACAGTGACCTTT        | AGCACATGCACGATACCCTC         | 117               | NM_001044526.1   |
| <i>RXR<math>\alpha</math></i>  | GTCCTCTTCAACCCGGACTC        | CTGCTCGGGTACTTGTGTT          | 114               | DQ279926.1       |
| <i>TMLHE</i>                   | CGGCACACTGACACTACCTATT      | AATCCATCTACCAGCAGTGTCC       | 104               | XM_003135511.3   |
| <i>OCTN1</i>                   | CCCACCCTGGTCAGGAACAT        | GGCAGAACTCTGTTGTAAGCAC       | 110               | NM_001145752.1   |
| <i>OCTN2</i>                   | ATCAGATGCTCAGGGTCAAAGG      | CCAGGAGGAAGGAGTCCATTTT       | 108               | XM_013995112.1   |
| <i>ALD</i>                     | GACTAGCTGCCGGTGTCTTC        | AACTCCACAGGGCTGACATT         | 112               | XM_021089487.1   |
| <i>RPL9</i>                    | GCAACTGTTGCGACCATCTG        | CGACGTTGATGGGGAAGTGA         | 109               | NM_001243481.1   |
